# Supplementary material
Source: publisher figshare collection journal article supplement (https://sage.figshare.com/ndownloader/files/14530451)
Supplement: Supplementary file 1 [file 14530451]

**Supplementary Table 1:** Mean bias and mean absolute deviation for the empirical and the Weibull approach for sex cancers with high mortality and two common sex-specific types when metastasized (breast and prostate cancer). All estimates are in years.

| Cancer type                   | Empirical                |                         | Weibull                  |                         |
|-------------------------------|--------------------------|-------------------------|--------------------------|-------------------------|
|                               | Mean bias (95% CI)       | Mean absolute deviation | Mean bias (95% CI)       | Mean absolute deviation |
| Stomach                       | -0.133 (-0.308 ; 0.042)  | 0.256                   | -0.436 (-0.621 ; -0.251) | 0.442                   |
| Colon                         | -1.050 (-1.513 ; -0.588) | 1.050                   | 1.569 (0.308 ; 2.829)    | 1.758                   |
| Rectum, rectosigmoid, anus    | -0.930 (-1.638 ; -0.222) | 1.087                   | 1.842 (-0.970 ; 4.654)   | 2.313                   |
| Pancreas                      | -0.026 (-0.121 ; 0.069)  | 0.096                   | -0.071 (-0.167 ; 0.024)  | 0.082                   |
| Lung, trachea                 | -0.163 (-0.264 ; -0.063) | 0.167                   | -0.273 (-0.396 ; -0.149) | 0.275                   |
| Breast                        | 0.380 (0.013 ; 0.747)    | 0.415                   | 0.372 (0.152 ; 0.592)    | 0.372                   |
| Prostate                      | 0.031 (-0.120 ; 0.182)   | 0.124                   | -0.138 (-0.336 ; 0.059)  | 0.169                   |
| Kidney excluding renal pelvis | -0.467 (-1.311 ; 0.377)  | 0.926                   | 2.782 (-1.134 ; 6.699)   | 3.270                   |

**Supplementary Table 2:** Estimates for the linear relationship between the discounted mean survival times (annual rate of 3%) and logarithmic HRs. The table shows the slope, intercept, standard deviation, and correlation stratified on cancer type for the six cancers with highest mortality and two common sex-specific types when metastasized (breast and prostate cancer).

|                     | C16     | C18     | C19-21  | C25     | C33-34  | C50     | C61     | C64     |
|---------------------|---------|---------|---------|---------|---------|---------|---------|---------|
| <b>Slope</b>        | -2.7639 | -5.7958 | -6.6630 | -0.8630 | -2.8964 | -3.4034 | -2.3329 | -7.0361 |
| <b>(SE)</b>         | 0.4951  | 0.4592  | 0.6234  | 0.3329  | 0.6210  | 1.0118  | 0.5398  | 0.9730  |
| <b>Intercept</b>    | 0.0402  | -0.1904 | -0.3607 | -0.0103 | -0.0027 | 0.2373  | 0.0178  | -0.3434 |
| <b>(SE)</b>         | 0.0669  | 0.0923  | 0.1434  | 0.0465  | 0.0593  | 0.2487  | 0.0748  | 0.2396  |
| <b>SD</b>           | 0.2761  | 0.3184  | 0.3887  | 0.1011  | 0.1726  | 0.5810  | 0.1840  | 0.4694  |
| <b>Correlation*</b> | 0.8310  | 0.9154  | 0.9130  | 0.9065  | 0.9266  | 0.8793  | 0.8902  | 0.8647  |

Note: Estimated using linear regression and weighted with a standard population of n = 500.

\* Correlation between intercept and slope based on estimated variance-covariance.

**Supplementary Figure 1:** Difference in discounted mean survival vs. logarithmic HR for eight included cancer types stratified on age groups and time of diagnosis, Norway, 1965 to 2004. Discounted with an annual rate of 3%.

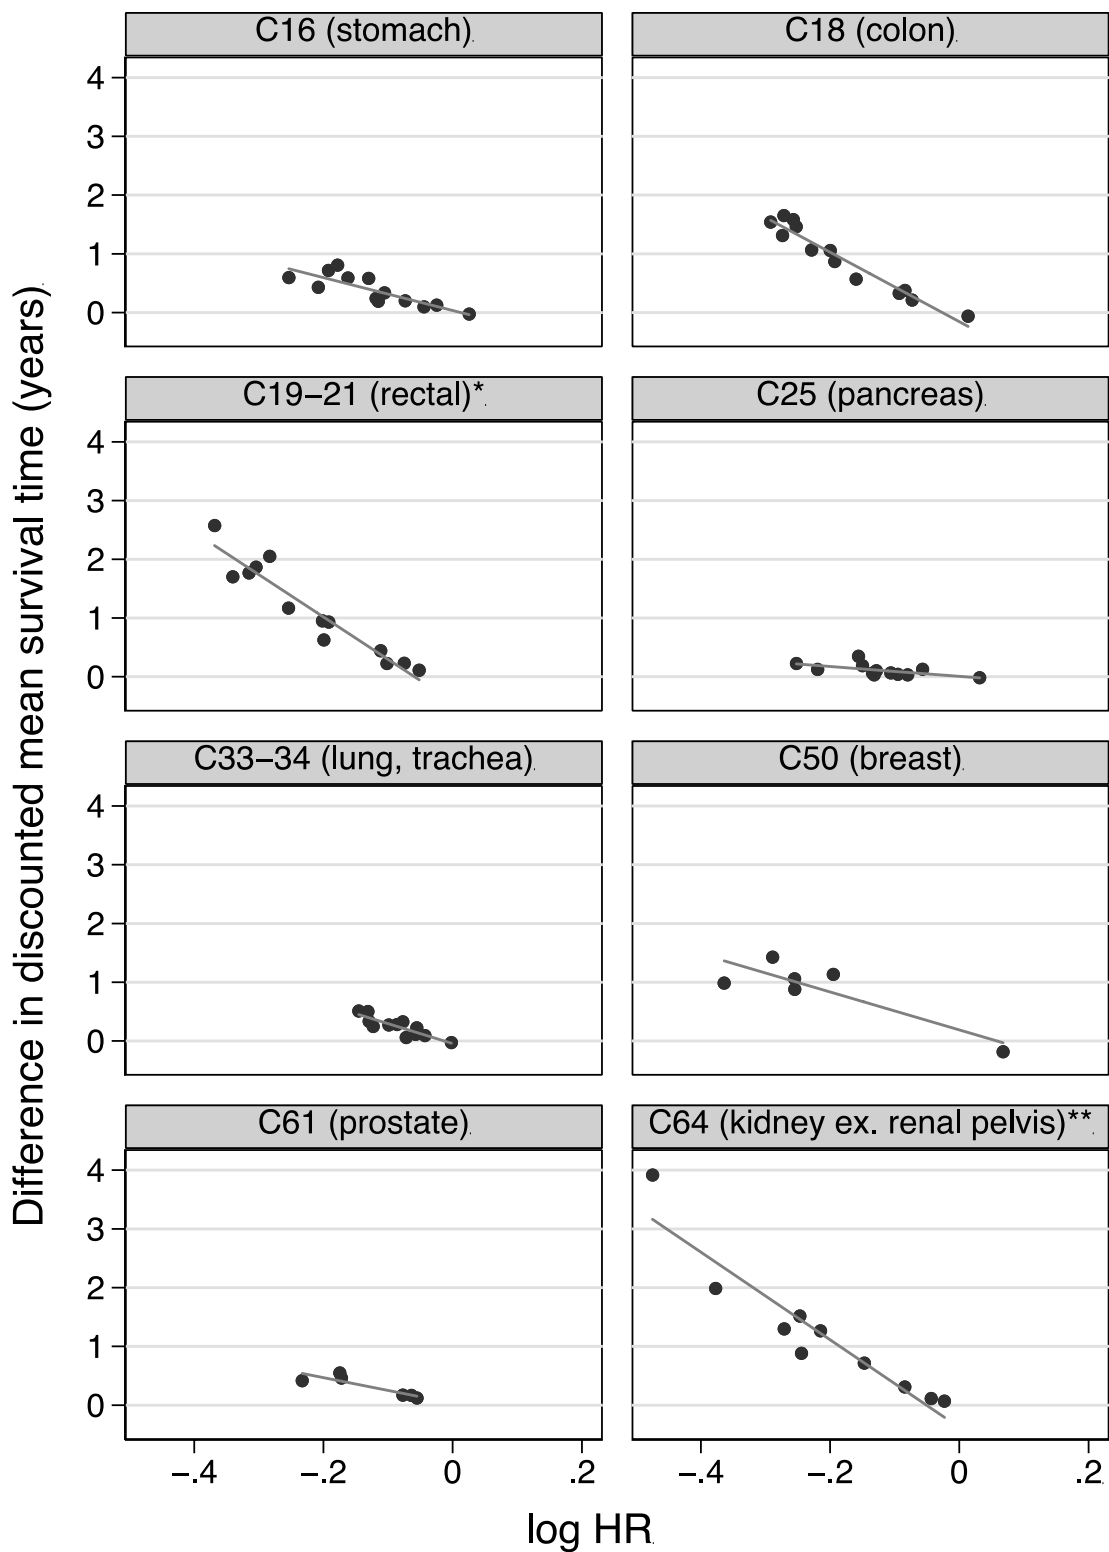

\* Rectum, rectosigmoid, anus

\*\* Kidney excluding renal pelvis
